# Supplementary material for: Gene expression profiles during postnatal development of the liver and pancreas in giant pandas
Source: publisher site journal article supplement (doi:10.18632/aging.103783), 2020-08-15
Supplement: Supplementary file [file aging-v12i15-103783-supplementary-material-SD1.pdf]

## SUPPLEMENTARY FIGURES

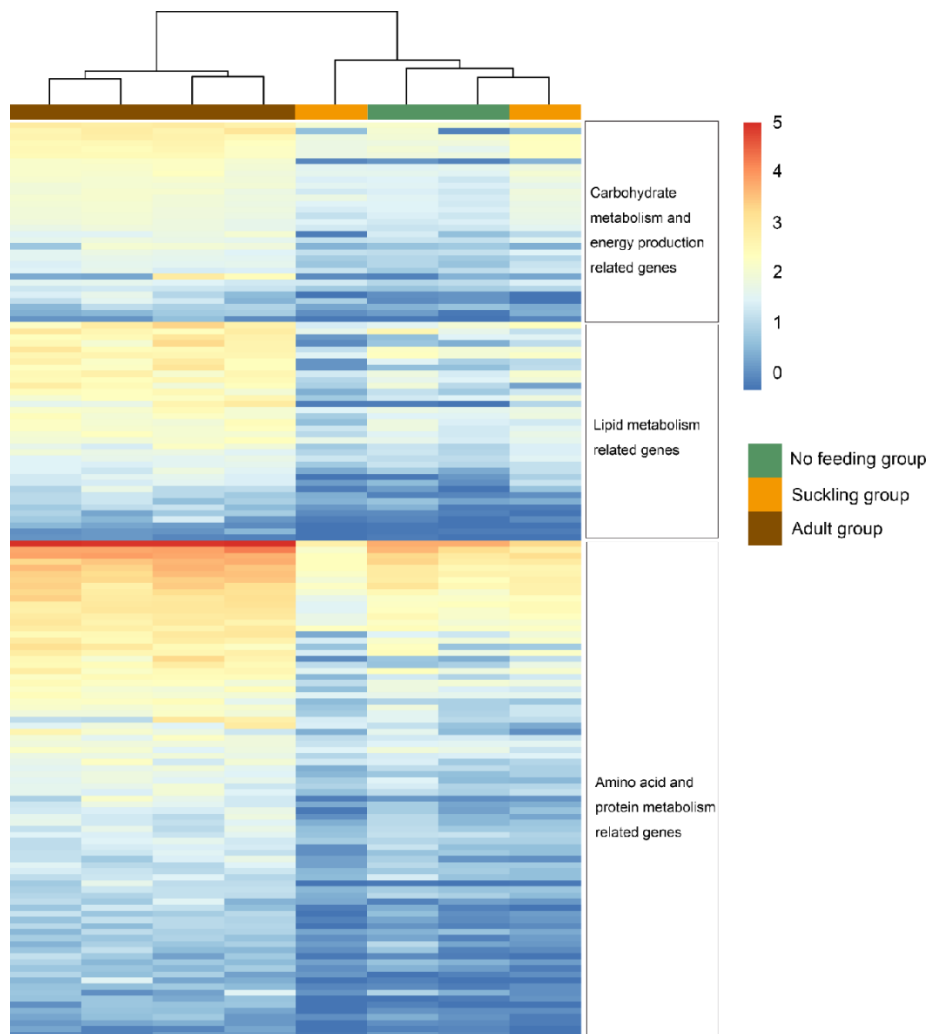

**Supplementary Figure 1 Heat map plot of 146 metabolism-related DEGs in the liver.** Each column represents a specimen and each row represents a gene. Clustering is performed in column. Color indicates the log10-transformed normalized CPM expression values.

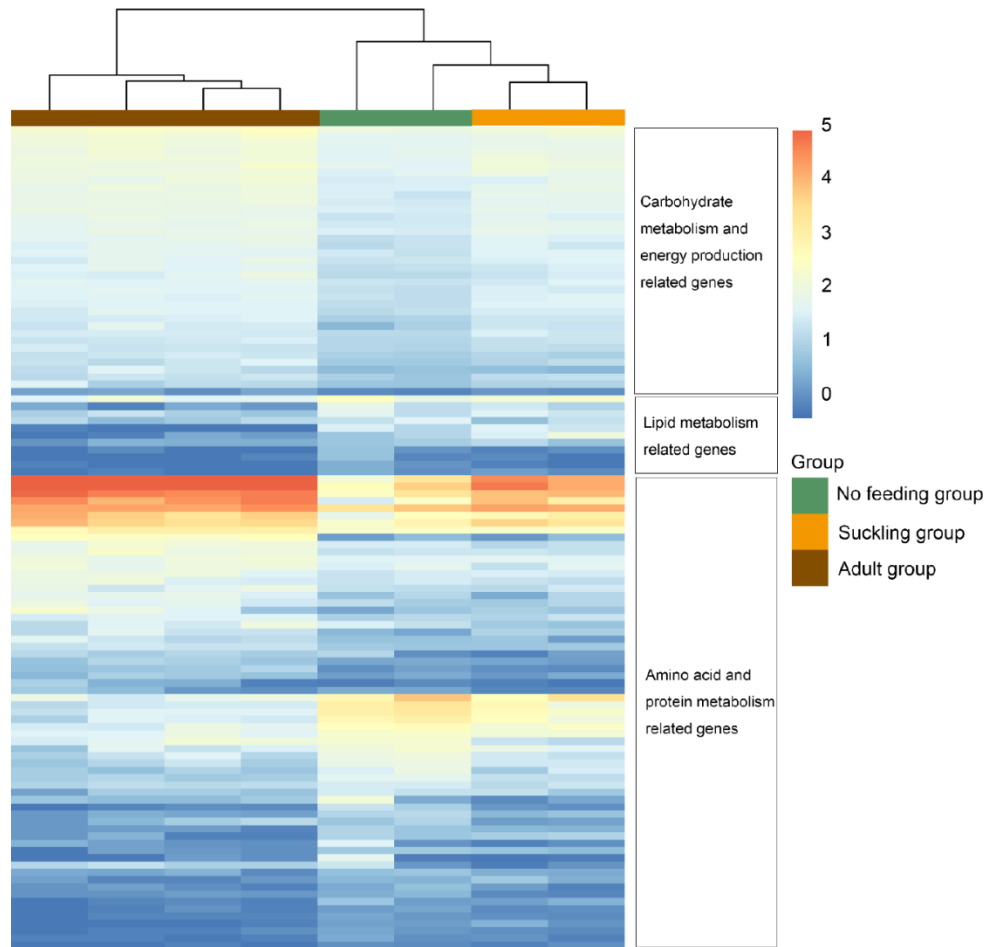

**Supplementary Figure 2. Heat map plot of 113 metabolism-related DEGs in the pancreas.** Each column represents a specimen and each row represents a gene. Clustering is performed in column. Color indicates the log<sub>10</sub>-transformed normalized CPM expression values.
